# Supplementary material for: MONARCH plus: abemaciclib plus endocrine therapy in women with HR+/HER2– advanced breast cancer: the multinational randomized phase III study
Source: PubMed Central journal article supplement — Ther Adv Med Oncol. 2020 Oct 22;12:1758835920963925. doi: 10.1177/1758835920963925 (PMC7586037; doi:10.1177/1758835920963925), 2020-10-22

## **SUPPLEMENTARY MATERIAL**

Manuscript title: MONARCH plus: Abemaciclib Plus Endocrine Therapy in Women With HR+/HER2- Advanced Breast Cancer: The Multinational Randomized Phase 3 Study

**Supplementary Table 1.** Ethics Committees for MONARCH plus

**Supplementary Table 2.** Best Overall Response in ITT Population With Measurable Disease

**Supplementary Table 3.** Laboratory Abnormalities

**Supplementary Figure 1.** Trial Profile

**Supplementary Figure 2.** Best Percentage Change From Baseline in Tumor Size in the ITT Population With Measurable Disease in (A) Cohort A and (B) Cohort B

## SUPPLEMENTARY TABLES

**Supplementary Table 1.** Ethics Committees for MONARCH plus

| <b>Country and Site Number</b> | <b>Name and Address of Ethics Committee</b>                                                                                                                                                                                      |
|--------------------------------|----------------------------------------------------------------------------------------------------------------------------------------------------------------------------------------------------------------------------------|
| China                          |                                                                                                                                                                                                                                  |
| #110                           | IRB of The Fifth Medical Center of PLA General Hospital<br>No. 8 East Street, Fengtai District, Beijing, China                                                                                                                   |
| #111                           | Medical Ethics Committee of Fudan University Shanghai Cancer Center<br>No.270, Dong An Road, Shanghai, China                                                                                                                     |
| #112                           | Clinical Medicine Ethics Committee of The First Affiliated Hospital of Bengbu Medical College<br>No.287, Changhuai Road, Bengbu, Anhui, China                                                                                    |
| #113                           | Ethic Committee of Beijing Cancer Hospital<br>No.52, Fucheng Road, Haidian District, Beijing, China                                                                                                                              |
| #116                           | Guangdong Provincial People's Hospital Ethics Committee<br>No.106, Zhong Shan Er Road, Guangzhou, Guangdong, China                                                                                                               |
| #118                           | Ethics Committee of Hubei Cancer Hospital<br>No 116, Zhuodaoquan South Road, Hongshan District, 430079, Wuhan, China                                                                                                             |
| #119                           | Ethics Committee for Drug Clinical Trials of Huazhong University of Science and Technology<br>Room #12, Level 16, No 2 Jiaoxue Building, Tongji Medical College Jichu Medical College, No.13, Hnagkong Road, Wuhan, China        |
| #120                           | Harbin Medical University Cancer Hospital Ethics Committee<br>No.150, Haping Road, Harbin, Helongjiang, China                                                                                                                    |
| #122                           | Shanghai General Hospital Institutional Review Board<br>No.100, Haining Road, Shanghai, China                                                                                                                                    |
| #123                           | IRB of Liaoning Cancer Hospital/Liaoning Cancer Hospital<br>Building 2 F1 EC Office, No.44, Xiaoheyuan Road, Dadong District, Shenyang, Liaoning, China                                                                          |
| #124                           | IRB of Jilin Province Cancer Hospital<br>F4 Tumor Research Institute EC Office, No.1018, Huguang Road, Chaoyang District, Changchun, Jilin, China                                                                                |
| #125                           | Medical Ethics Committee of Hunan Cancer Hospital<br>4th floor, Building 15, Hunan Cancer Hospital, No.283, Tongzipo Road, Yuelu District, Changsha, Hunan, China                                                                |
| #126                           | Tianjin Medical University Cancer Institute and Hospital Ethics Committee<br>Huanhu West Road, North of Ti Yuan, Hexi District, Tianjin, China                                                                                   |
| #127                           | Human Research Ethics Committee of The Second Affiliated Hospital of Zhejiang University School of Medicine<br>No.88, Jiefang Road, Hangzhou, Zhejiang, China                                                                    |
| #128                           | Ethics Committee of Jiangsu Cancer Hospital<br>No.42, Baiziting, Nanjing, Jiangsu, China                                                                                                                                         |
| #129                           | The First Hospital of China Medical University Ethics Committee<br>No.155, Nanjingbei Street, Heping District, Shenyang, Liaoning, China                                                                                         |
| #130                           | Zhejiang Cancer Hospital Institutional Review Board<br>Room 308, Administrative Research Building, Zhejiang Cancer Hospital, No.1, Banshan East Road, Gongshu District, Hangzhou, Zhejiang, China                                |
| #131                           | Ethics Committee for Drug Clinical Trials of Huazhong University of Science and Technology<br>Room #12, Level 16, No 2 Jiaoxue Building, Tongji Medical College Jichu Medical College, No.13, Hnagkong Road, Wuhan, Hubei, China |
| #133                           | Medical Ethics Committee of Henan Cancer Hospital<br>Room 113, First Floor, Building 5, Henan Cancer Hospital, No.127, Dongming Road, Zhengzhou, Henan, China                                                                    |

| <b>Country and Site Number</b> | <b>Name and Address of Ethics Committee</b>                                                                                                                                                                                                           |
|--------------------------------|-------------------------------------------------------------------------------------------------------------------------------------------------------------------------------------------------------------------------------------------------------|
| #134                           | The Fourth Hospital of Hebei Medical University Ethics Committee<br>No.12, Jiankang Road, Shijiazhuang & No.169 Tianshan Street,<br>Shijiazhuang, Hebei, China                                                                                        |
| #135                           | Medical Ethic Committee of The Second Hospital of Dalian Medical<br>University<br>No.467, Zhongshan Road, Shahekou District, Dalian, Liaoning, China                                                                                                  |
| #136                           | Ethics Committee of Nanjing Drum Tower Hospital<br>No.321, Zhongshan Road, Nanjing, Jiangsu, China                                                                                                                                                    |
| #139                           | Ethics Committee of National Drug Clinical Trial Institution of Fuzhou<br>General Hospital of Nanjing Military Region of the People's Liberation Army<br>No.156, West Erhuan North Road, Fuzhou, Fujian, China                                        |
| #140                           | Medical Ethics Committee of The First Affiliated Hospital of Xi'an Jiaotong<br>University<br>First Floor, Science and Education Building, The First Affiliated Hospital of<br>Xi'an Jiaotong University, No.277, Yanta District, Xi'an, Shanxi, China |
| #141                           | Affiliated Cancer Hospital of Guangxi Medical University Ethics Committee<br>No.71, Hedi Road, Qingxiu District, Nanning, Guangxi, China                                                                                                              |
| #142                           | Ethics Committee of the First Affiliated Hospital With Nanjing Medical<br>University<br>No.300, Guangzhou Road, Nanjing, Jiangsu, China                                                                                                               |
| #143                           | Sun Yat-Sen Memorial Hospital, Sun Yat-Sen University Ethics Committee<br>No.107, Yanjiangxi Road, Guangzhou, China                                                                                                                                   |
| #144                           | Ethics Committee of Fujian Cancer Hospital<br>Ethics Office, 3rd floor, Radiotherapy Building, Fujian Cancer Hospital,<br>No.420, Fuma Road, Jin'an District, Fuzhou, Fujian, China                                                                   |
| <b>Brazil</b>                  |                                                                                                                                                                                                                                                       |
| #150                           | Hospital do Câncer de Barretos/Fundação Pio XII - Rua Antenor Duarte<br>Vilela 1331,<br>Bairro Dr. Paulo Prata, Barretos, Sao Paulo, 14784700, Brazil                                                                                                 |
| #151                           | USP - Faculdade de Medicina da Universidade de São Paulo - FMUSP<br>Av Dr Arnaldo, 251, Cerqueira César 21º Andar, São Paulo, 01246-000,<br>Brazil                                                                                                    |
| #152                           | Centro de Referência da Saúde da Mulher - CRSM<br>Av. Brigadeiro Luis Antonio, 683 - 2º Andar, Bela Vista, São Paulo, 01317-<br>000, Brazil                                                                                                           |
| #153                           | Faculdade de Medicina de São José do Rio Preto - FAMERP - SP<br>Av Brigadeiro Faria Lima 5544, Sao Jose Rio Preto, Sao Paulo, 15090-000,<br>Brazil                                                                                                    |
| #154                           | Universidade Regional do Roroeste do Estado do Rio Grande do Sul - Ijuí<br>Rua do Comércio, 3000 - Bairro Universitário, Ijuí, RS, 98700-000, Brazil                                                                                                  |
| #155                           | Hospital Mãe de Deus/Associação Educadora São Carlos<br>Rua da Costa, 150 - Menino Deus, Comite de Etica Pesquisa da<br>Associação Educadora São Carlos, Porto Alegre, RS, 90470-340, Brazil                                                          |
| <b>India</b>                   |                                                                                                                                                                                                                                                       |
| #160                           | Dr. B.L. Kapur Memorial Hospital Ethics Committee<br>Dr. B.L. Kapur Memorial Hospital, Pusa Road, New Delhi, 11005, India                                                                                                                             |
| #161                           | HCG- Central Ethics Committee<br>HCG-Bangalore Institute of Oncology, HCG Towers, Tower 1, 1st Floor,<br>No.8, P. Kalinga Road, Sampangiram Nagar, Bangalore, 560027,<br>Karnataka, India                                                             |
| #162                           | Ethics Committee, M.S. Ramaiah Medical College and Hospitals<br>MSR Nagar, MSRIT Post, Bangalore, 560054, Karnataka, India                                                                                                                            |
| #163                           | Clinical Research Ethics Committee<br>Medica Superspecialty Hospital, No.127, Mukundpur, E.M. Bypass, Kolkata,<br>700099, India                                                                                                                       |
| #165                           | Institutional Ethics Committee<br>Tata Memorial Hospital, Dr. E. Borges Marg, Parel, Mumbai, 400012, India                                                                                                                                            |

| <b>Country and Site Number</b> | <b>Name and Address of Ethics Committee</b>                                                                                                          |
|--------------------------------|------------------------------------------------------------------------------------------------------------------------------------------------------|
| #167                           | Ethics Committee Jehangir Clinical Development Centre Pvt. Ltd.<br>Jehangir Hospital Premises, No.32, Sassoon Road, Pune, India                      |
| #168                           | Institutional Review Board<br>Office of Research, 1st Floor, Carman Block, Christian Medical College,<br>Vellore, Tamil Nadu, 632004, India          |
| #169                           | Gujarat Cancer Society and Gujarat Cancer & Research Institute Ethics<br>Committee<br>Civil Hospital Campus, Asarwa, Ahmedabad, 380016, India        |
| South Africa                   |                                                                                                                                                      |
| #170                           | PHARMA-ETHICS<br>PO Box 786, Irene, 0062, Gauteng, Republic of South Africa, 123 Amkor<br>Road, Lyttelton Manor Ext 3, Centurion, 0157, South Africa |
| #172                           | PHARMA-ETHICS<br>PO Box 786, Irene, 0062, Gauteng, Republic of South Africa, 123 Amkor<br>Road, Lyttelton Manor Ext 3, Centurion, 0157, South Africa |
| #173                           | PHARMA-ETHICS<br>PO Box 786, Irene, 0062, Gauteng, Republic of South Africa, 123 Amkor<br>Road, Lyttelton Manor Ext 3, Centurion, 0157, South Africa |

**Supplementary Table 2.** Best Overall Response in ITT Population With Measurable Disease<sup>a</sup>

|                            | Cohort A                      |                          | Cohort B                            |                                 |
|----------------------------|-------------------------------|--------------------------|-------------------------------------|---------------------------------|
|                            | Abemaciclib + NSAI<br>(n=176) | Placebo + NSAI<br>(n=83) | Abemaciclib + fulvestrant<br>(n=80) | Placebo + fulvestrant<br>(n=38) |
| Best overall response      |                               |                          |                                     |                                 |
| Complete response          | 1.1 (0.0–2.7)                 | 0                        | 0                                   | 2.6 (0.0–7.7)                   |
| Partial response           | 64.8 (57.7–71.8)              | 36.1 (25.8–46.5)         | 50.0 (39.0–61.0)                    | 7.9 (0.0–16.5)                  |
| Stable disease             | 25.0 (18.6–31.4)              | 45.8 (35.1–56.5)         | 42.5 (31.7–53.3)                    | 55.3 (39.5–71.1)                |
| ≥6 months                  | 16.5 (11.0–22.0)              | 25.3 (15.9–34.7)         | 27.5 (17.7–37.3)                    | 31.6 (16.8–46.4)                |
| Progressive disease        | 4.5 (1.5–7.6)                 | 15.7 (7.8–23.5)          | 7.5 (1.7–13.3)                      | 28.9 (14.5–43.4)                |
| Not evaluable              | 4.5 (1.5–7.6)                 | 2.4 (0.0–5.7)            | 0                                   | 5.3 (0.0–12.4)                  |
| Objective response rate    | 65.9 (58.9–72.9)              | 36.1 (25.8–46.5)         | 50.0 (39.0–61.0)                    | 10.5 (0.8–20.3)                 |
| Stratified <i>P</i> -value |                               | <0.0001                  |                                     | <0.0001                         |
| Disease control rate       | 90.9 (86.7–95.2)              | 81.9 (73.6–90.2)         | 92.5 (86.7–98.3)                    | 65.8 (50.7–80.9)                |
| Stratified <i>P</i> -value |                               | 0.0551                   |                                     | 0.0004                          |
| Clinical benefit rate      | 82.4 (76.8–88.0)              | 61.4 (51.0–71.9)         | 77.5 (68.3–86.7)                    | 42.1 (26.4–57.8)                |
| Stratified <i>P</i> -value |                               | 0.0004                   |                                     | 0.0001                          |

Abbreviations: ITT, intent-to-treat; NSAI, nonsteroidal aromatase inhibitor.

<sup>a</sup>Data are % (95% confidence interval), unless otherwise stated.

**Supplementary Table 3. Laboratory Abnormalities<sup>a</sup>**

|                               | Cohort A            |            |            |           |         |            | Placebo + NSAID |           |           |         |         |           |
|-------------------------------|---------------------|------------|------------|-----------|---------|------------|-----------------|-----------|-----------|---------|---------|-----------|
|                               | Abemaciclib + NSAID |            |            |           |         |            | Placebo + NSAID |           |           |         |         |           |
|                               | (n=205)             |            |            |           |         |            | (n=99)          |           |           |         |         |           |
|                               | N1                  | Grade 1    | Grade 2    | Grade 3   | Grade 4 | Total      | N1              | Grade 1   | Grade 2   | Grade 3 | Grade 4 | Total     |
| <b>Hematology</b>             |                     |            |            |           |         |            |                 |           |           |         |         |           |
| <b>laboratory toxicity</b>    |                     |            |            |           |         |            |                 |           |           |         |         |           |
| Neutropenia <sup>b</sup>      | 200                 | 41 (20.5)  | 93 (46.5)  | 46 (23.0) | 0       | 180 (90.0) | 96              | 11 (11.5) | 7 (7.3)   | 3 (3.1) | 0       | 21 (21.9) |
| Leukopenia <sup>c</sup>       | 201                 | 54 (26.9)  | 109 (54.2) | 21 (10.4) | 0       | 184 (91.5) | 96              | 22 (22.9) | 10 (10.4) | 1 (1.0) | 0       | 33 (34.4) |
| Anemia                        | 201                 | 85 (42.3)  | 68 (33.8)  | 13 (6.5)  | 0       | 166 (82.6) | 96              | 11 (11.5) | 11 (11.5) | 1 (1.0) | 0       | 23 (24.0) |
| Thrombocytopenia <sup>d</sup> | 200                 | 115 (57.5) | 20 (10.0)  | 6 (3.0)   | 0       | 141 (70.5) | 95              | 13 (13.7) | 3 (3.2)   | 1 (1.1) | 0       | 17 (17.9) |
| Lymphocyte count decreased    | 200                 | 47 (23.5)  | 53 (26.5)  | 12 (6.0)  | 0       | 112 (56.0) | 96              | 18 (18.8) | 5 (5.2)   | 0       | 1 (1.0) | 24 (25.0) |
| Lymphocytopenia <sup>e</sup>  | 200                 | 0          | 1 (0.5)    | 0         | 0       | 1 (0.5)    | 96              | 0         | 2 (2.1)   | 0       | 0       | 2 (2.1)   |
| <b>Chemistry</b>              |                     |            |            |           |         |            |                 |           |           |         |         |           |
| <b>laboratory tests</b>       |                     |            |            |           |         |            |                 |           |           |         |         |           |
| Hypocalcemia                  | 201                 | 29 (14.4)  | 4 (2.0)    | 0         | 0       | 33 (16.4)  | 96              | 10 (10.4) | 2 (2.1)   | 0       | 0       | 12 (12.5) |
| Hypokalemia                   | 201                 | 32 (15.9)  | 0          | 12 (6.0)  | 1 (0.5) | 45 (22.4)  | 96              | 5 (5.2)   | 0         | 1 (1.0) | 0       | 6 (6.3)   |
| Hyponatremia                  | 201                 | 23 (11.4)  | 0          | 3 (1.5)   | 0       | 26 (12.9)  | 96              | 7 (7.3)   | 0         | 1 (1.0) | 0       | 8 (8.3)   |
| Hyperkalemia                  | 201                 | 19 (9.5)   | 1 (0.5)    | 0         | 0       | 20 (10.0)  | 96              | 6 (6.3)   | 3 (3.1)   | 0       | 0       | 9 (9.4)   |
| Hypercalcemia                 | 201                 | 84 (41.8)  | 1 (0.5)    | 0         | 0       | 85 (42.3)  | 96              | 35 (36.5) | 0         | 0       | 0       | 35 (36.5) |
| Hypoalbuminemia               | 201                 | 5 (2.5)    | 2 (1.0)    | 0         | 0       | 7 (3.5)    | 96              | 1 (1.0)   | 1 (1.0)   | 0       | 0       | 2 (2.1)   |
| Hypernatremia                 | 201                 | 34 (16.9)  | 0          | 0         | 0       | 34 (16.9)  | 96              | 20 (20.8) | 0         | 0       | 0       | 20 (20.8) |
| <b>Hepatic function tests</b> |                     |            |            |           |         |            |                 |           |           |         |         |           |
| ALP increased                 | 201                 | 40 (19.9)  | 7 (3.5)    | 3 (1.5)   | 0       | 50 (24.9)  | 96              | 24 (25.0) | 1 (1.0)   | 0       | 0       | 25 (26.0) |
| AST increased                 | 201                 | 66 (32.8)  | 11 (5.5)   | 7 (3.5)   | 1 (0.5) | 85 (42.3)  | 96              | 27 (28.1) | 3 (3.1)   | 1 (1.0) | 1 (1.0) | 32 (33.3) |
| ALT increased                 | 201                 | 62 (30.8)  | 15 (7.5)   | 7 (3.5)   | 3 (1.5) | 87 (43.3)  | 96              | 27 (28.1) | 4 (4.2)   | 2 (2.1) | 0       | 33 (34.4) |
| Blood bilirubin increased     | 201                 | 11 (5.5)   | 1 (0.5)    | 1 (0.5)   | 1 (0.5) | 14 (7.0)   | 96              | 2 (2.1)   | 0         | 0       | 1 (1.0) | 3 (3.1)   |
| <b>Renal function tests</b>   |                     |            |            |           |         |            |                 |           |           |         |         |           |
| Creatinine increased          | 201                 | 82 (40.8)  | 112 (55.7) | 5 (2.5)   | 0       | 199 (99.0) | 95              | 77 (81.1) | 6 (6.3)   | 0       | 1 (1.1) | 84 (88.4) |

| <b>Cohort B</b>                              |           |                |                |                |                |              |                                         |                |                |                |                |              |
|----------------------------------------------|-----------|----------------|----------------|----------------|----------------|--------------|-----------------------------------------|----------------|----------------|----------------|----------------|--------------|
| <b>Abemaciclib + fulvestrant<br/>(n=104)</b> |           |                |                |                |                |              | <b>Placebo + fulvestrant<br/>(n=53)</b> |                |                |                |                |              |
|                                              | <b>N1</b> | <b>Grade 1</b> | <b>Grade 2</b> | <b>Grade 3</b> | <b>Grade 4</b> | <b>Total</b> | <b>N1</b>                               | <b>Grade 1</b> | <b>Grade 2</b> | <b>Grade 3</b> | <b>Grade 4</b> | <b>Total</b> |
| <b>Hematology laboratory toxicity</b>        |           |                |                |                |                |              |                                         |                |                |                |                |              |
| Neutropenia <sup>b</sup>                     | 104       | 17 (16.3)      | 51 (49.0)      | 25 (24.0)      | 0              | 93 (89.4)    | 53                                      | 6 (11.3)       | 4 (7.5)        | 0              | 0              | 10 (18.9)    |
| Leukopenia <sup>c</sup>                      | 104       | 24 (23.1)      | 56 (53.8)      | 19 (18.3)      | 0              | 99 (95.2)    | 53                                      | 10 (18.9)      | 2 (3.8)        | 2 (3.8)        | 0              | 14 (26.4)    |
| Anemia                                       | 104       | 43 (41.3)      | 44 (42.3)      | 8 (7.7)        | 0              | 95 (91.3)    | 53                                      | 11 (20.8)      | 2 (3.8)        | 1 (1.9)        | 0              | 14 (26.4)    |
| Thrombocytopenia <sup>d</sup>                | 103       | 57 (55.3)      | 7 (6.8)        | 1 (1.0)        | 0              | 65 (63.1)    | 52                                      | 3 (5.8)        | 3 (5.8)        | 0              | 0              | 6 (11.5)     |
| Lymphocytopenia <sup>e</sup>                 | 104       | 26 (25.0)      | 26 (25.0)      | 11 (10.6)      | 0              | 63 (60.6)    | 53                                      | 4 (7.5)        | 4 (7.5)        | 1 (1.9)        | 0              | 9 (17.0)     |
| <b>Chemistry laboratory tests</b>            |           |                |                |                |                |              |                                         |                |                |                |                |              |
| Hypocalcemia                                 | 104       | 22 (21.2)      | 1 (1.0)        | 0              | 0              | 23 (22.1)    | 53                                      | 7 (13.2)       | 1 (1.9)        | 0              | 0              | 8 (15.1)     |
| Hypokalemia                                  | 104       | 16 (15.4)      | 0              | 1 (1.0)        | 0              | 17 (16.3)    | 53                                      | 4 (7.5)        | 0              | 0              | 0              | 4 (7.5)      |
| Hyponatremia                                 | 104       | 11 (10.6)      | 0              | 1 (1.0)        | 0              | 12 (11.5)    | 53                                      | 3 (5.7)        | 0              | 0              | 0              | 3 (5.7)      |
| Hyperkalemia                                 | 104       | 6 (5.8)        | 0              | 1 (1.0)        | 0              | 7 (6.7)      | 53                                      | 3 (5.7)        | 1 (1.9)        | 0              | 0              | 4 (7.5)      |
| Hypercalcemia                                | 104       | 23 (22.1)      | 1 (1.0)        | 0              | 0              | 24 (23.1)    | 53                                      | 13 (24.5)      | 0              | 0              | 0              | 13 (24.5)    |
| Hypoalbuminemia                              | 104       | 1 (1.0)        | 0              | 0              | 0              | 1 (1.0)      | 53                                      | 1 (1.9)        | 1 (1.9)        | 0              | 0              | 2 (3.8)      |
| Hypernatremia                                | 104       | 20 (19.2)      | 0              | 0              | 0              | 20 (19.2)    | 53                                      | 6 (11.3)       | 0              | 0              | 0              | 6 (11.3)     |
| <b>Hepatic function tests</b>                |           |                |                |                |                |              |                                         |                |                |                |                |              |
| ALP increased                                | 104       | 12 (11.5)      | 2 (1.9)        | 1 (1.0)        | 0              | 15 (14.4)    | 53                                      | 6 (11.3)       | 5 (9.4)        | 0              | 0              | 11 (20.8)    |
| AST increased                                | 104       | 37 (35.6)      | 3 (2.9)        | 1 (1.0)        | 2 (1.9)        | 43 (41.3)    | 53                                      | 12 (22.6)      | 2 (3.8)        | 0              | 0              | 14 (26.4)    |
| ALT increased                                | 104       | 38 (36.5)      | 6 (5.8)        | 6 (5.8)        | 1 (1.0)        | 51 (49.0)    | 53                                      | 18 (34.0)      | 1 (1.9)        | 0              | 0              | 19 (35.8)    |
| Blood bilirubin increased                    | 104       | 4 (3.8)        | 1 (1.0)        | 0              | 0              | 5 (4.8)      | 53                                      | 2 (3.8)        | 1 (1.9)        | 0              | 1 (1.9)        | 4 (7.5)      |
| <b>Renal function tests</b>                  |           |                |                |                |                |              |                                         |                |                |                |                |              |
| Creatinine increased                         | 104       | 43 (41.3)      | 60 (57.7)      | 1 (1.0)        | 0              | 104 (100)    | 53                                      | 37 (69.8)      | 2 (3.8)        | 0              | 0              | 39 (73.6)    |

Abbreviations: ALP, alkaline phosphatase; ALT, alanine aminotransferase; AST, aspartate aminotransferase; CTCAE, Common Terminology Criteria for Adverse Events; N1, number of patients with at least a baseline result and 1 postbaseline result; NSAI, nonsteroidal aromatase inhibitor.

<sup>a</sup>Data are No. (%).

<sup>b</sup>CTCAE term neutrophil count decreased.

<sup>c</sup>CTCAE term white blood cell count decreased.

<sup>d</sup>CTCAE term platelet count decreased.

<sup>e</sup>CTCAE term lymphocyte count decreased.

## SUPPLEMENTARY FIGURES

### Supplementary Figure 1. Trial Profile.

ITT, intent-to-treat; NSAID, nonsteroidal aromatase inhibitor

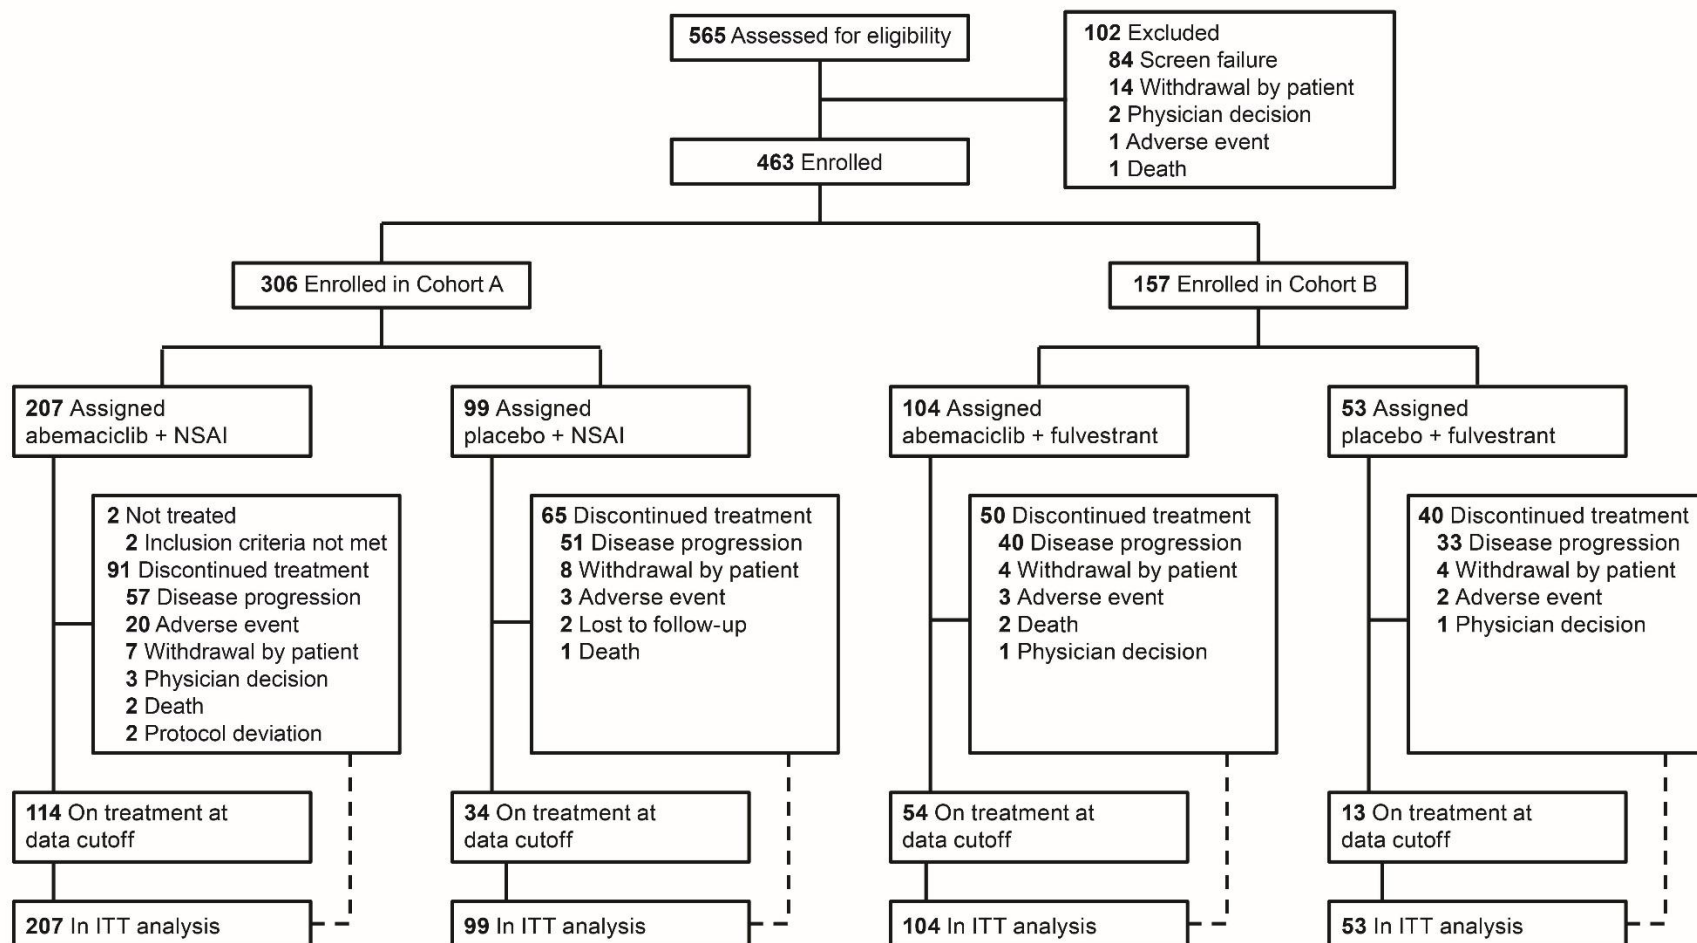



**Supplementary Figure 2.** Best Percentage Change From Baseline in Tumor Size in the ITT Population With Measurable Disease in (A) Cohort A and (B) Cohort B.

CR, complete response; ITT, intent-to-treat; NSAI, nonsteroidal aromatase inhibitor; PD, progressive disease; PR, partial response; SD, stable disease.

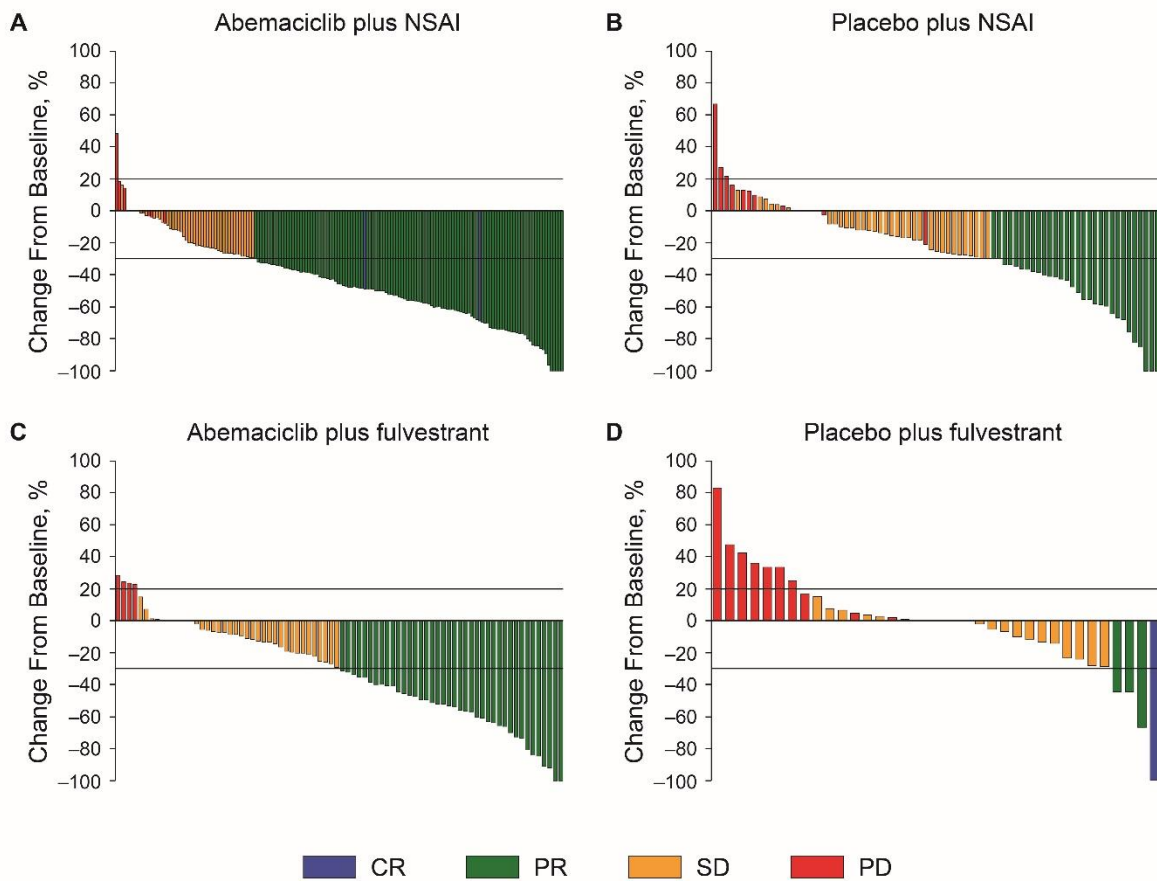

Supplement: MONARCH_plus_supplement_27Jul20.pdf [file MONARCH_plus_supplement_27Jul20.pdf]
